# Supplementary material for: Autophagy Mediates Escherichia Coli-Induced Cellular Inflammatory Injury by Regulating Calcium Mobilization, Mitochondrial Dysfunction, and Endoplasmic Reticulum Stress
Source: MDPI journal article supplement (doi:10.3390/ijms232214174), 2022-11-16
Supplement: s1 [file s1]

Table S1: Primer pairs used for Real time quantitative PCR

| Name             | Sequence of primer (5' to 3') | Literature or gene number |
|------------------|-------------------------------|---------------------------|
| IL-1 $\beta$ -F  | CAACCGTACCTGAACCCA            | NM_174093.1               |
| IL-1 $\beta$ -R  | ACGATGACCGACACCACC            |                           |
| IL-18-F          | ACTTTGGCAAACCTGAACC           | NM_174091.2               |
| IL-18-R          | CCTCTAGTGAGGCTGTCCTT          |                           |
| mtND1-F          | CTAGTCTCGGGCTTCAACG           | NC_006853.1               |
| mtND1-R          | GGGTAGGATGCTCGGATT            |                           |
| mtND2-F          | AGCCTACTCATCAATCGC            |                           |
| mtND2-R          | TGACAGGGTAGTGGTGGT            |                           |
| MtND3-F          | CATCGCATTCTGACTTCC            |                           |
| MtND3-R          | ATTTGCTGTTTGTGAGGC            |                           |
| MtND4-F          | TTACCCGATGAGGAAACC            |                           |
| MtND4-R          | ATAACGAGTGCTATGTGGC           |                           |
| MtND5-F          | TGATACGGACGAGCAGAT            |                           |
| MtND5-R          | TTGAGTCGCTTGGGTTTA            |                           |
| MtND6-F          | CTGTAGCCATAGCCGTTGT           |                           |
| MtND6-R          | GGGTTAGGGTTAATTGTGAGT         |                           |
| POLG-F           | AAGGCGAAGAAAGGGAAGA           | XM_024982309.1            |
| POLG-R           | TGGAGGCTGAGGAGACTGG           |                           |
| SSBP1-F          | AGGCATGAGTCTGAAGTAGCT         | NM_001037466.1            |
| SSBP1-R          | CGGTCGGAACACTGAAAT            |                           |
| TWNK-F           | CGAGGAACAGCCTGCTTA            | NM_001098463.1            |
| TWNK-R           | TCCGATGTCCCTTCAAAA            |                           |
| TOP-F            | AGTCCGACACGATAACAAG           | NM_001206487.2            |
| TOP-R            | CGATGAAGTACAGGGCTAC           |                           |
| PGC1 $\alpha$ -F | CATGGTACGTGCCATAAA            | NM_001205551.3            |
| PGC1 $\alpha$ -R | AGAGCAGAACCGCTTGAT            |                           |
| TFAM-F           | AAGATGCTTACAGGGCAGAC          | NM_001034016.2            |
| TFAM-R           | TGTTCCCTCCCAAGATTTC           |                           |
| NRF1-F           | GCCATTGTCCTTTGTATCTC          | NM_001098002.2            |
| NRF1-R           | AACCCTTTGCTTCTGCTC            |                           |
| GAPDH-F          | ATGCTGGTGCTGAGTATGT           | NM_001034034.2            |
| GAPDH-R          | CAATCTTGAGGGTGTTGTTAT         |                           |

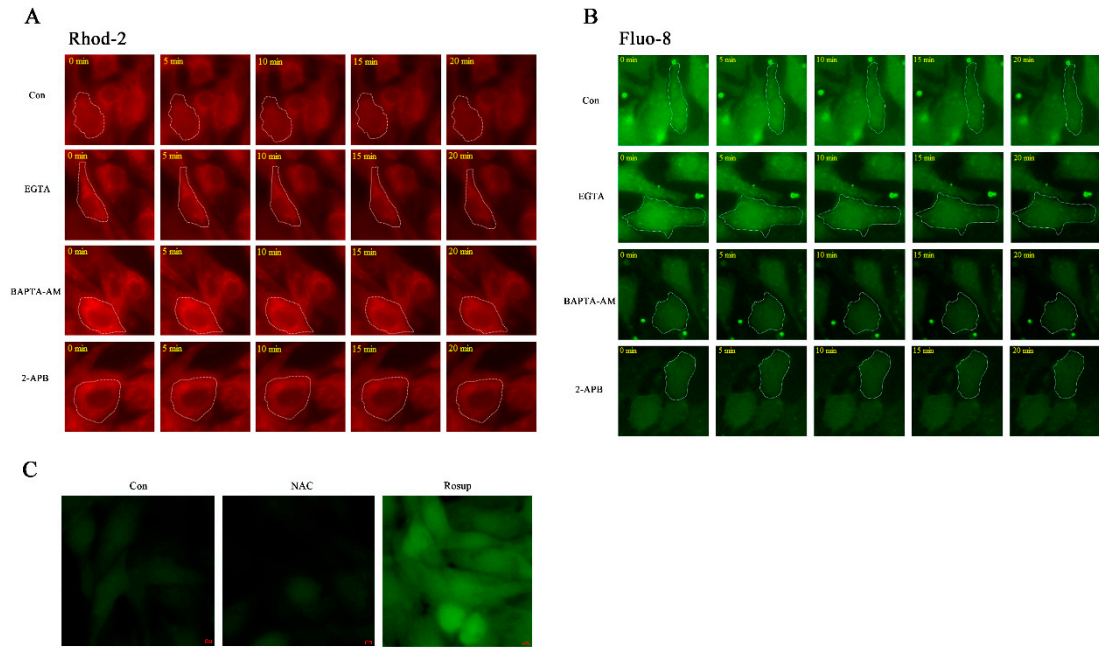

Figure S1: Effects of inhibitors on mitochondrial  $\text{Ca}^{2+}$ , cytoplasmic  $\text{Ca}^{2+}$  and ROS. Primary bEECs were treated with EGTA (5 mM), BAPTA-AM (10  $\mu\text{M}$ ), 2-APB (50  $\mu\text{M}$ ) or NAC (8 mM). EGTA is a  $\text{Ca}^{2+}$  chelator that captures extracellular  $\text{Ca}^{2+}$ . BAPTA-AM is a selective, permeable free  $\text{Ca}^{2+}$  chelator that sequesters cytoplasmic  $\text{Ca}^{2+}$ . 2-APB inhibits IP3 receptors and blocks release of calcium from store-operated calcium channels. The anti-oxidant properties of NAC are thought to combat some of the effects of oxidative stress. (A) Live-cell imaging was used to monitor mitochondrial  $\text{Ca}^{2+}$  levels. (B) Fluo-8 AM was used to monitor cytosolic  $\text{Ca}^{2+}$  levels in real time. (C) ROS levels was detected by DCFH-DA fluorescence after 6 h of NAC treatment. Rosup was a positive control for ROS.
